# Supplementary material
Source: HighWire-hosted journal article supplement (https://www.cmaj.ca/highwire/filestream/148899/field_highwire_adjunct_files/4/221512-res-5-at.pdf)
Supplement: 221512-res-5-at.pdf [file 221512-res-5-at.pdf]

**Supplementary Table 4:** 1-year overall survival probability for the three patient cohorts diagnosed during Jan 2018 - December 2020

| Cancer     | 2018              | 2019              | 2020              | p-val log-rank |
|------------|-------------------|-------------------|-------------------|----------------|
| Bladder    | 87.2 (85.1, 89.2) | 87.9 (85.8, 90.1) | 90.0 (87.6, 92.4) | 0.24           |
| Breast     | 96.5 (95.8, 97.1) | 96.6 (95.9, 97.2) | 96.7 (95.9, 97.5) | 0.91           |
| Cervix     | 93.7 (90.2, 97.4) | 89.9 (85.3, 94.7) | 95.0 (91.1, 99.0) | 0.22           |
| Colorectal | 80.7 (79.2, 82.3) | 83.0 (81.4, 84.6) | 76.6 (74.4, 79.0) | <.001          |
| Kidney     | 89.0 (86.8, 91.3) | 87.6 (84.9, 90.3) | 87.1 (83.7, 90.5) | 0.58           |
| Lung       | 48.9 (47.0, 50.8) | 49.4 (47.4, 51.6) | 48.1 (45.6, 50.6) | 0.43           |
| Melanoma   | 95.8 (94.6, 97.1) | 95.3 (94.0, 96.7) | 95.1 (93.3, 96.9) | 0.79           |
| NHL        | 81.5 (78.9, 84.1) | 80.8 (78.1, 83.6) | 74.7 (71.2, 78.2) | 0.003          |
| Prostate   | 96.6 (95.9, 97.2) | 96.0 (95.3, 96.7) | 95.5 (94.5, 96.5) | 0.17           |
| Uterus     | 92.5 (90.6, 94.4) | 92.4 (90.4, 94.4) | 90.6 (88.1, 93.2) | 0.38           |
